# Supplementary material
Source: publisher figshare collection journal article supplement (https://acs.figshare.com/ndownloader/files/3976552)
Supplement: Supplementary file 1 [file 3976552]

## Supporting Information

### *In-Situ* Formed Lithium Sulfide/Microporous Carbon Cathodes for Lithium-Ion Batteries

Shiyu Zheng, Yvonne Chen, Yunhua Xu, Feng Yi, Yujie Zhu, Yihang Liu, Junhe Yang,\* and Chunsheng Wang\*

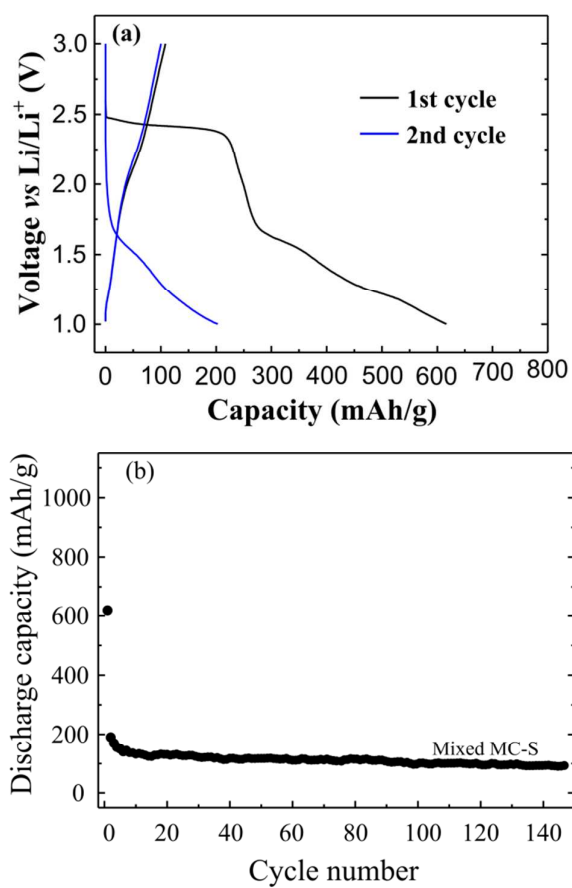

**Figure S1.** (a) Voltage profiles, and (b) Discharge capacity curve of the mixed MC-S electrode at a current density of 100 mA/g.

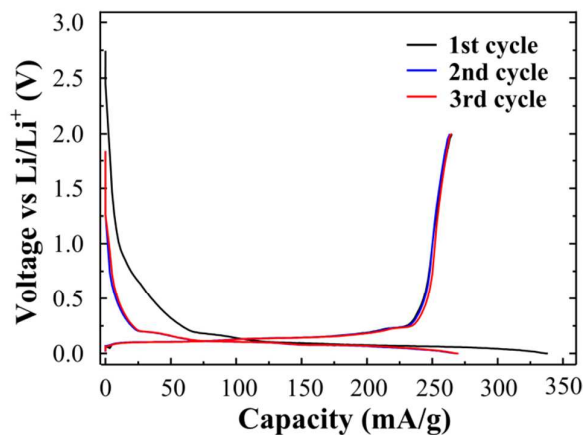

**Figure S2.** Discharge/charge voltage profiles of the graphite anode in the first three cycles.

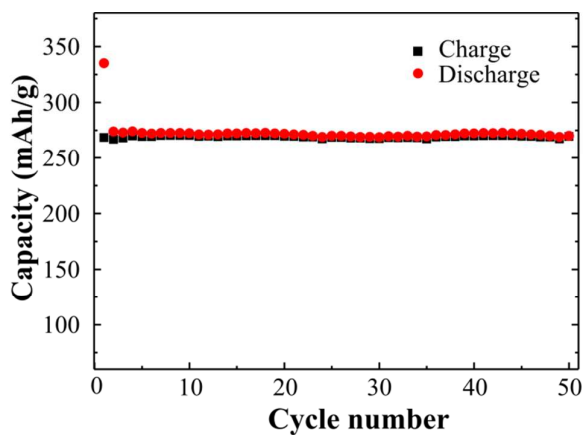

**Figure S3.** Cycling electrochemical properties of the graphite anode, showing a capacity of 270 mAh/g with moderate cycle life.

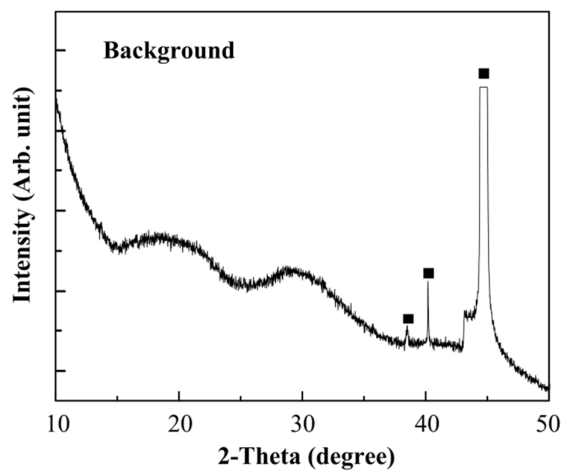

**Figure S4.** XRD pattern of Al foil covered with Scotch tape (Background).

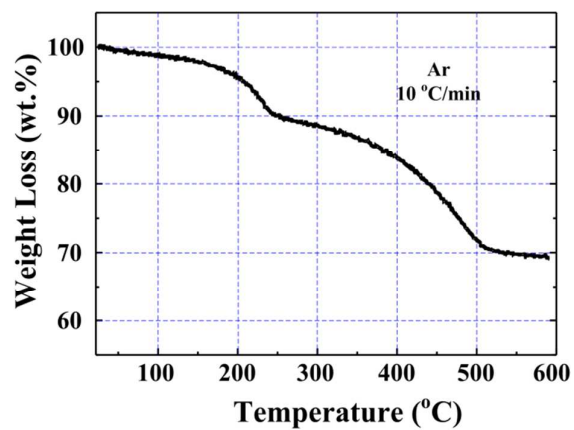

**Figure S5.** TGA curve of the S/MC composite, showing the content of elemental sulfur is around a mass fraction of 30%.
